# Supplementary material for: Effect of the Terminal Acceptor Unit on the Performance of Non-Fullerene Indacenodithiophene Acceptors in Organic Solar Cells
Source: MDPI journal article supplement (doi:10.3390/molecules27041229), 2022-02-11
Supplement: s1 [file s1]

## Supporting Information

for

### **Effect of the terminal acceptor unit on the performance of non-fullerene indacenodithiophene acceptors in organic solar cells**

by

Natalia Terenti,<sup>1§</sup> Gavril-Ionel Giurgi,<sup>1§,2</sup> Lorant Szolga,<sup>1,2</sup> Ioan Stroia,<sup>1</sup> Anamaria Terec,<sup>1</sup> Ion Grosu<sup>1</sup> and Andreea Petronela Crişan<sup>\*1</sup>

<sup>1</sup> Department of Chemistry and SOOMCC, Faculty of Chemistry and Chemical Engineering, Babes-Bolyai University, Cluj-Napoca, Romania. E-mail: [andreea.crisan@ubbcluj.ro](mailto:andreea.crisan@ubbcluj.ro)

<sup>2</sup> Optoelectronics Group, Base of Electronics Department, ETTI, Technical University of Cluj-Napoca, Cluj-Napoca, Romania.

§ : these two authors contributed equally to the work

## Table of Contents

|                                                                                                    |           |
|----------------------------------------------------------------------------------------------------|-----------|
| Figure S1. <sup>1</sup> H NMR (CDCl <sub>3</sub> , 600 MHz) spectrum of compound IDT-1 .....       | <b>S3</b> |
| Figure S2. <sup>13</sup> C NMR (CDCl <sub>3</sub> , 150 MHz) spectrum of compound IDT-1 .....      | <b>S3</b> |
| Figure S3. APCI (+)-HRMS spectrum of compound IDT-1 .....                                          | <b>S4</b> |
| Figure S4. <sup>1</sup> H NMR (CDCl <sub>3</sub> , 400 MHz) spectrum of compound IDT-2.....        | <b>S4</b> |
| Figure S5. <sup>13</sup> C NMR (CDCl <sub>3</sub> , 100 MHz) spectrum of compound IDT-2 .....      | <b>S5</b> |
| Figure S6. APCI (+)-HRMS spectrum of compound IDT-2 .....                                          | <b>S5</b> |
| Figure S7. <sup>1</sup> H NMR (CDCl <sub>3</sub> , 400 MHz) spectrum of compound IDT-3 .....       | <b>S6</b> |
| Figure S8. <sup>13</sup> C-APT NMR (CDCl <sub>3</sub> , 100 MHz) spectrum of compound IDT-3 .....  | <b>S6</b> |
| Figure S9. ESI (+)-HRMS spectrum of compound IDT-3 .....                                           | <b>S7</b> |
| Figure S10. <sup>1</sup> H NMR (CDCl <sub>3</sub> , 600 MHz) spectrum of compound IDT-4 .....      | <b>S7</b> |
| Figure S11. <sup>13</sup> C-APT NMR (CDCl <sub>3</sub> , 150 MHz) spectrum of compound IDT-4 ..... | <b>S8</b> |
| Figure S12. APCI (+)-HRMS spectrum of compound IDT-4 .....                                         | <b>S8</b> |
| Figure S13. DFT calculated structure of IDT-1 .....                                                | <b>S9</b> |
| Figure S14. DFT calculated structure of IDT-2 .....                                                | <b>S9</b> |

|                                                                                                                                                             |            |
|-------------------------------------------------------------------------------------------------------------------------------------------------------------|------------|
| Figure S15. DFT calculated structure of IDT-3.....                                                                                                          | <b>S9</b>  |
| Figure S16. DFT calculated structure of IDT-4 .....                                                                                                         | <b>S10</b> |
| Table S1. DFT coordinates of IDT-1 .....                                                                                                                    | <b>S10</b> |
| Table S2. DFT coordinates of IDT-2 .....                                                                                                                    | <b>S12</b> |
| Table S3. DFT coordinates of IDT-3 .....                                                                                                                    | <b>S15</b> |
| Table S4. DFT coordinates of IDT-4 .....                                                                                                                    | <b>S17</b> |
| Figure S17. <i>J-V</i> characteristics of BHJ OSCs for different P3HT : <i>n</i> -type molecule ratios. (a) IDT-1, (b) IDT-2, (c) IDT-3 and (d) IDT-4 ..... | <b>S21</b> |
| Figure S18. Absorption spectra of P3HT : <i>n</i> -type molecule blend films .....                                                                          | <b>S21</b> |
| Figure S19. Log <i>J</i> -log <i>V</i> curve of the electron-only devices.....                                                                              | <b>S22</b> |
| Table S5. Photovoltaic characteristics of IDT-1, IDT-2, IDT-3, IDT-4 and PC <sub>60</sub> BM under various conditions .....                                 | <b>S23</b> |
| Chart S1. HOMO-LUMO energy levels for the IDT core and electron-withdrawing groups....                                                                      | <b>S24</b> |

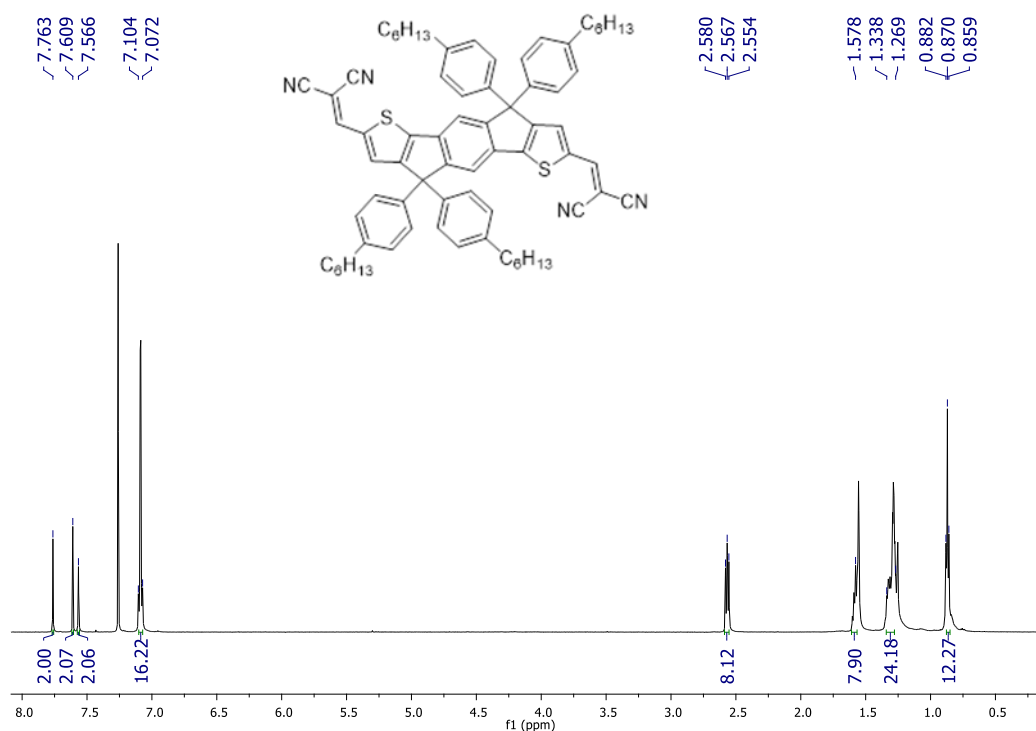

Figure S1. <sup>1</sup>H NMR (CDCl<sub>3</sub>, 600 MHz) spectrum of compound IDT-1

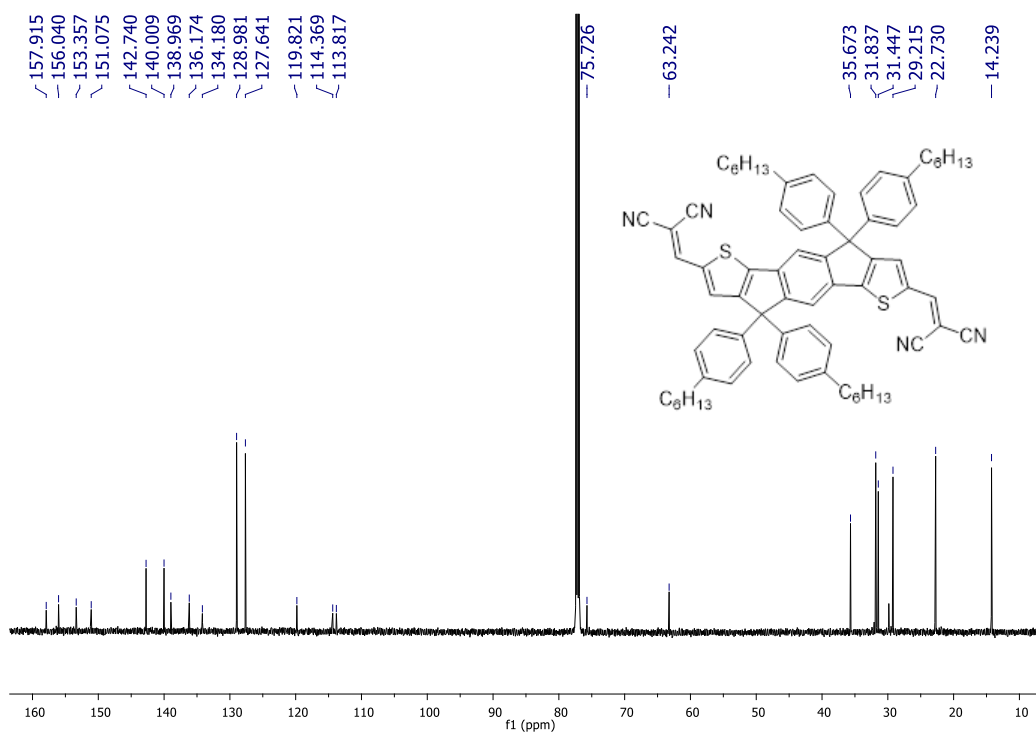

Figure S2. <sup>13</sup>C NMR (CDCl<sub>3</sub>, 150 MHz) spectrum of compound IDT-1

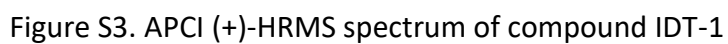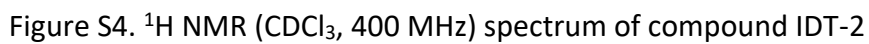

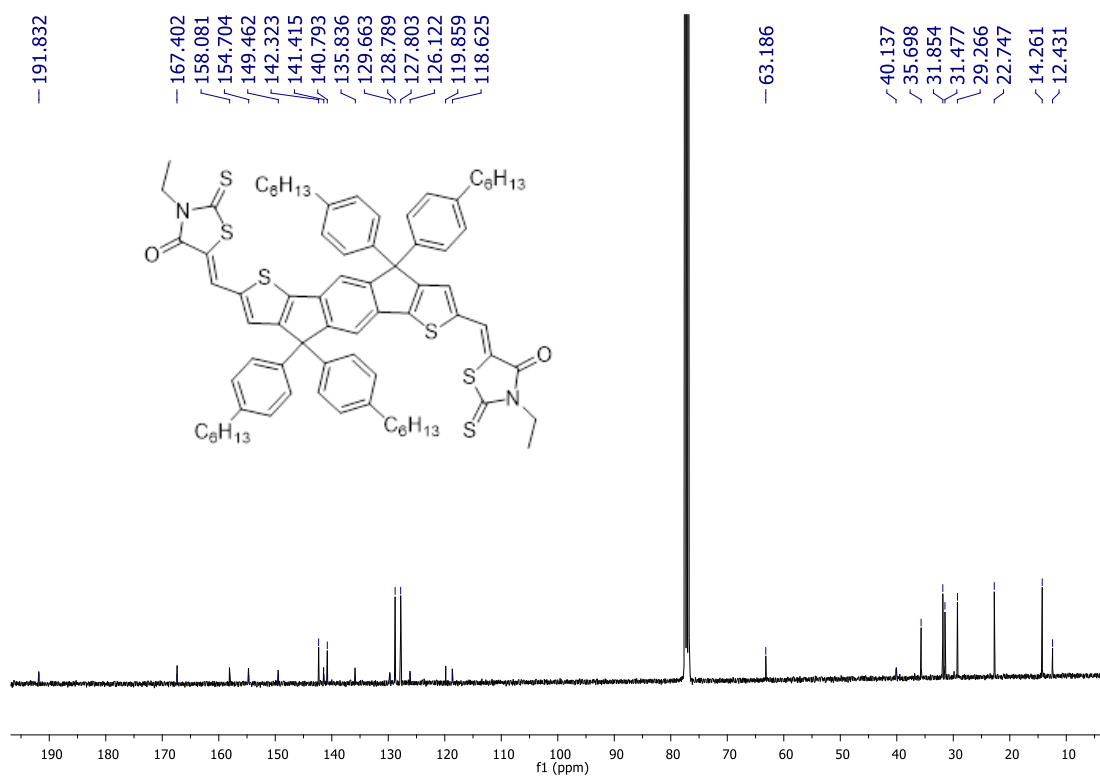

Figure S5. <sup>13</sup>C NMR (CDCl<sub>3</sub>, 100 MHz) spectrum of compound IDT-2

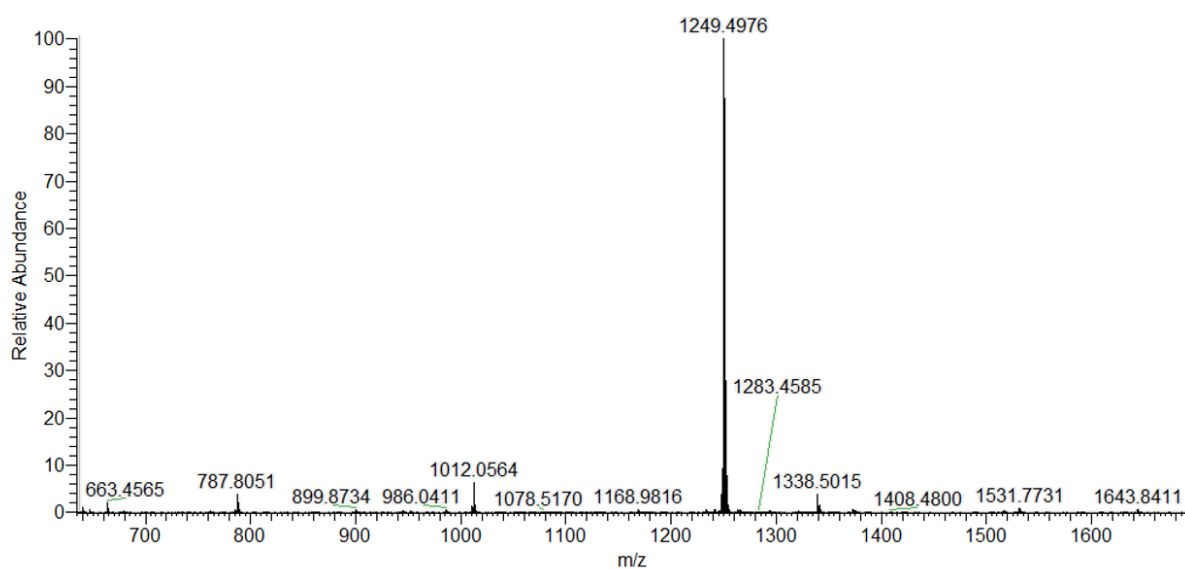

Figure S6. APCI (+)-HRMS spectrum of compound IDT-2

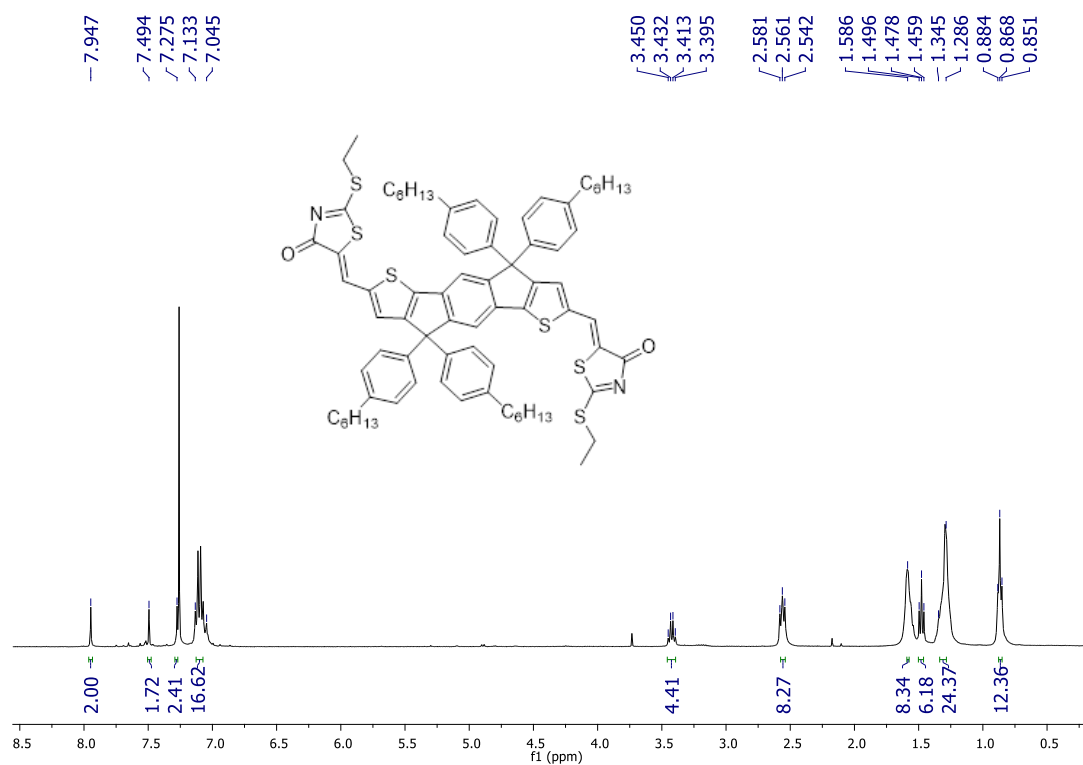

Figure S7. <sup>1</sup>H NMR (CDCl<sub>3</sub>, 400 MHz) spectrum of compound IDT-3

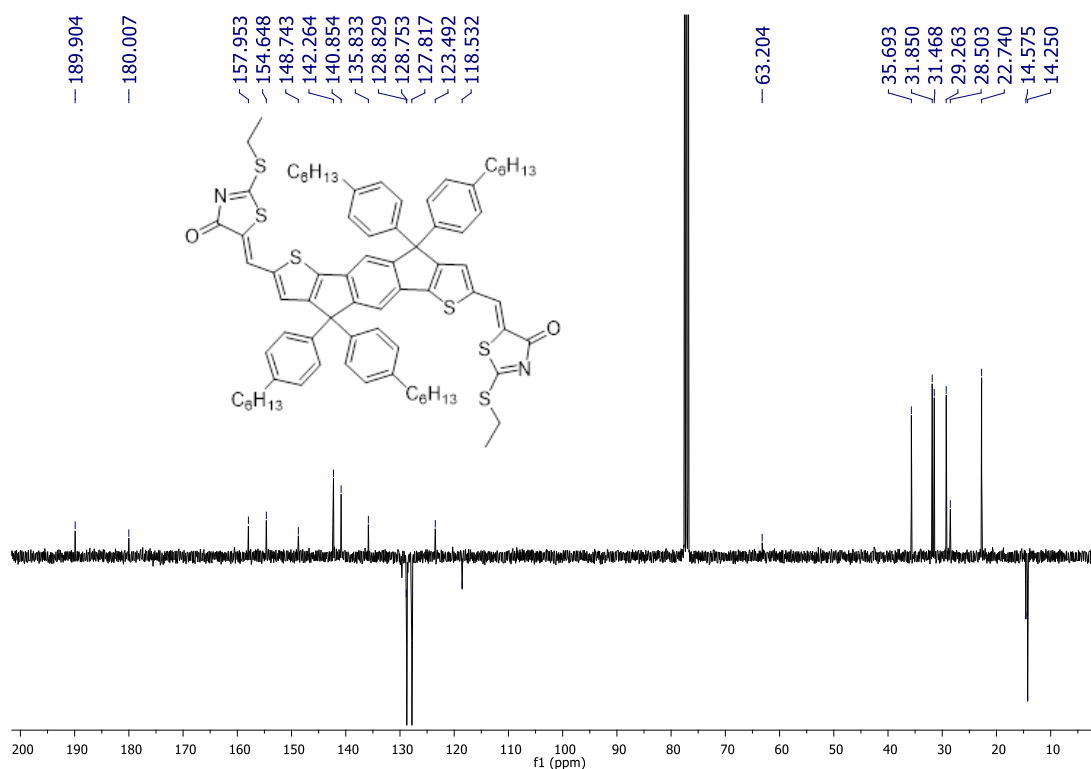

Figure S8. <sup>13</sup>C-APT NMR (CDCl<sub>3</sub>, 100 MHz) spectrum of compound IDT-3

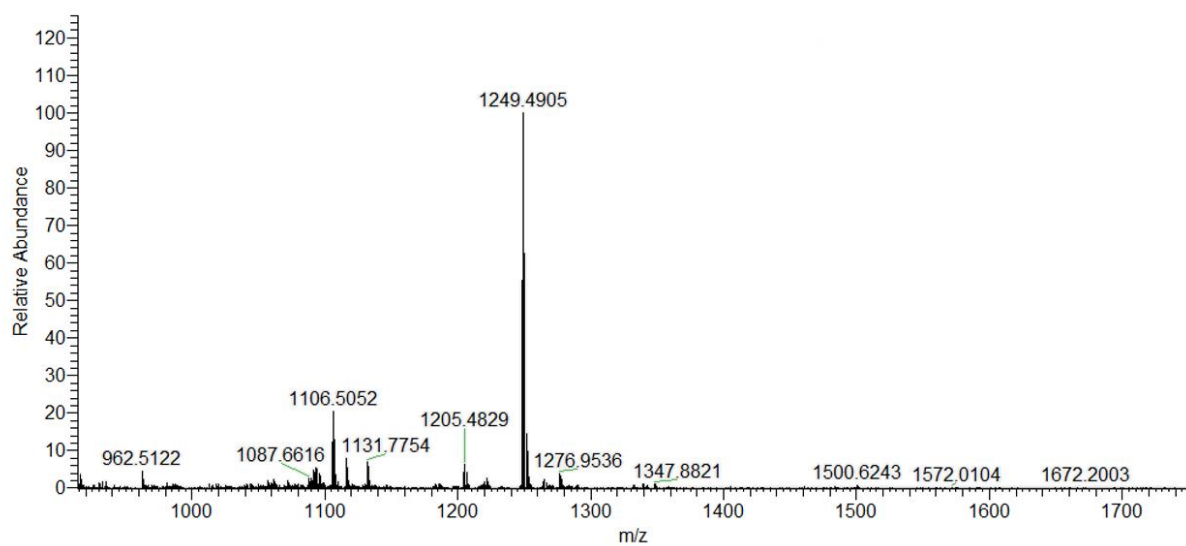

Figure S9. ESI (+)-HRMS spectrum of compound IDT-3

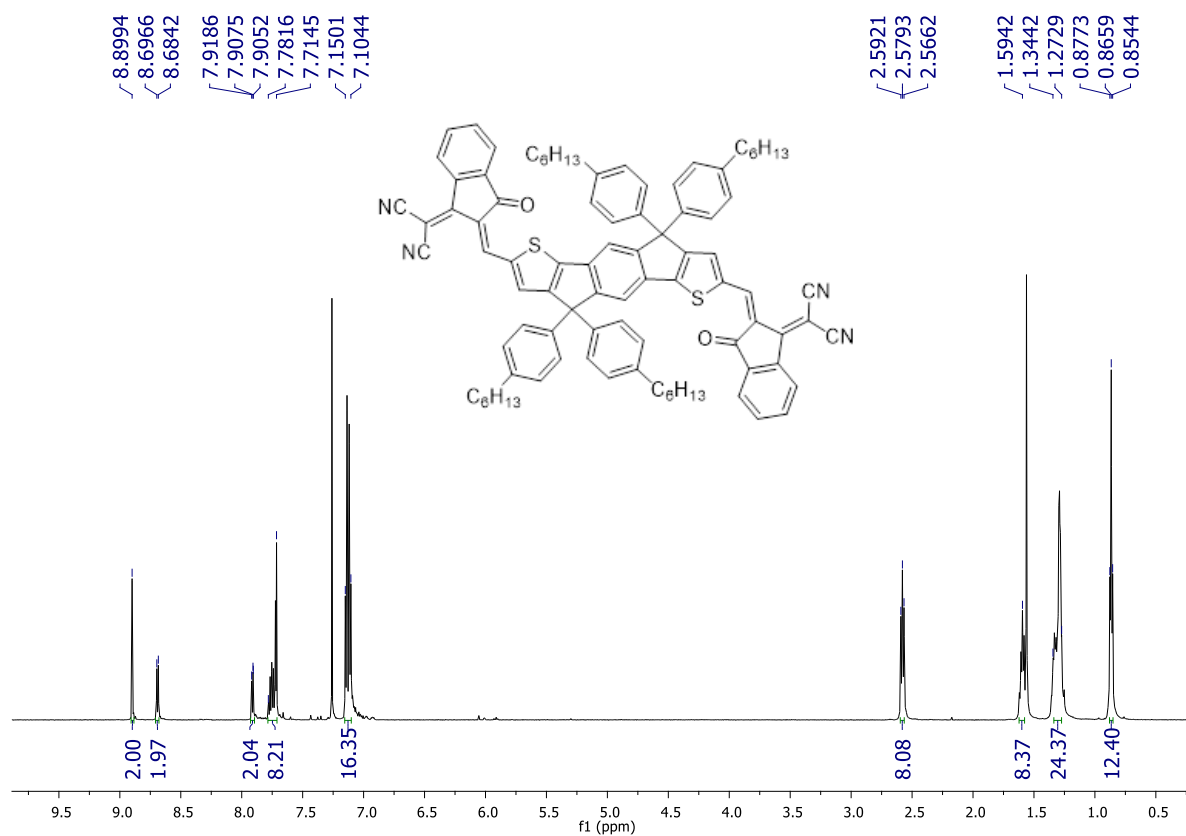

Figure S10.  $^1\text{H}$  NMR ( $\text{CDCl}_3$ , 600 MHz) spectrum of compound IDT-4

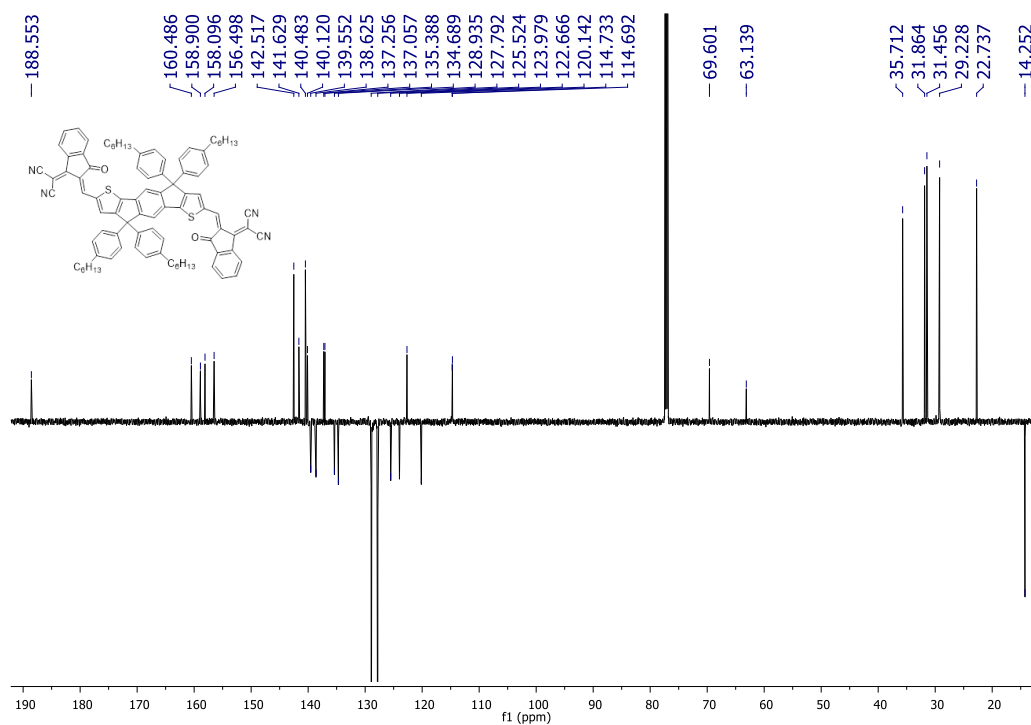

Figure S11.  $^{13}\text{C}$ -APT NMR (CDCl<sub>3</sub>, 150 MHz) spectrum of compound IDT-4

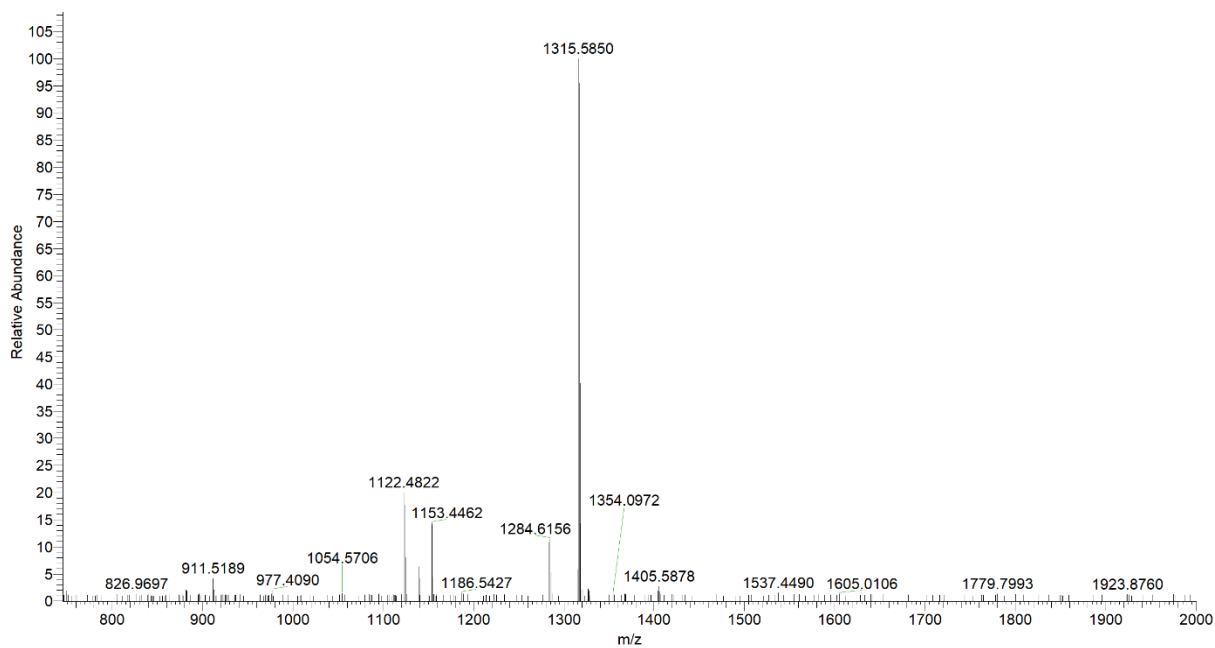

Figure S12. APCI (+)-HRMS spectrum of compound IDT-4



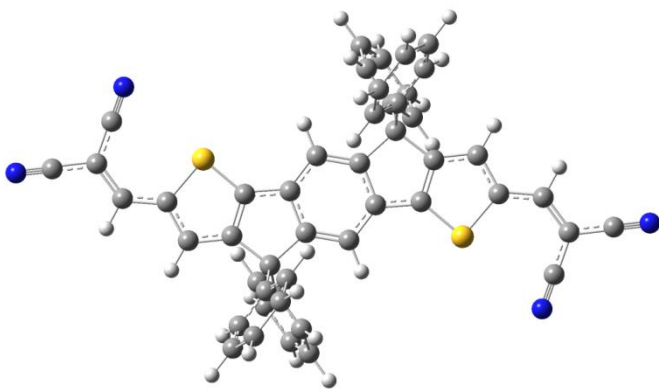

Figure S13. DFT calculated structure of IDT-1

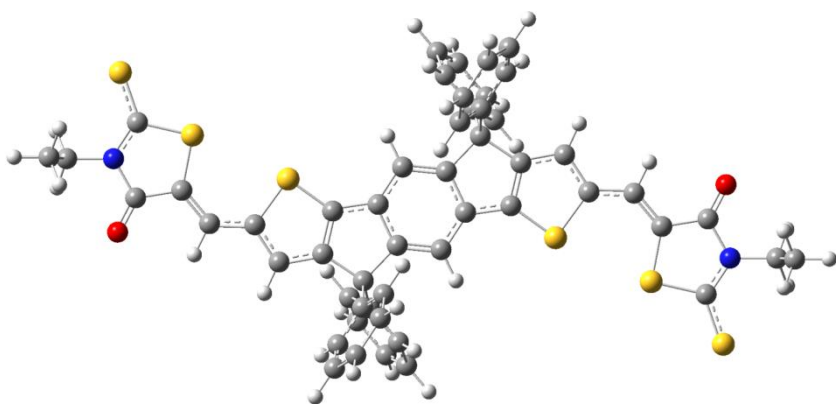

Figure S14. DFT calculated structure of IDT-2

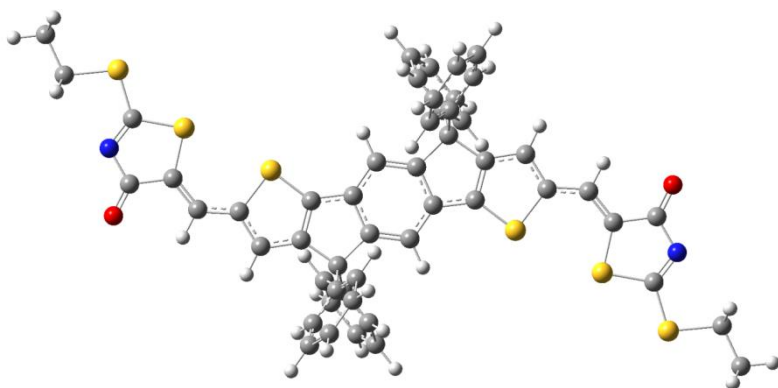

Figure S15. DFT calculated structure of IDT-3

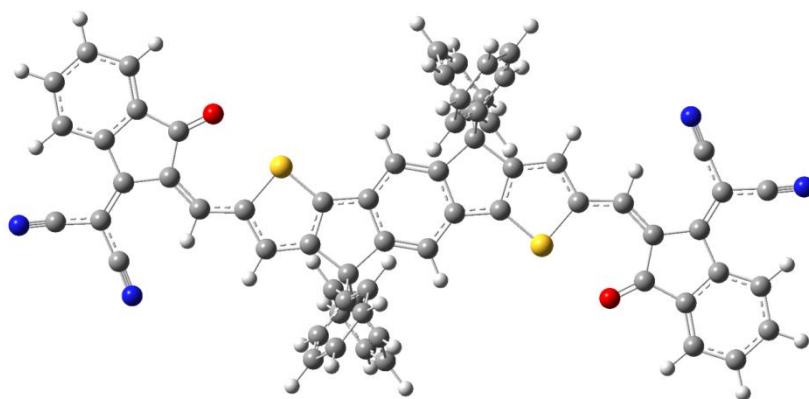

Figure S16. DFT calculated structure of IDT-4

**Table S1. DFT coordinates of IDT-1**

$E = -2860.70124808$  Hartrees

$E_{\text{LUMO}} = -0,12743$  Hartrees

$E_{\text{HOMO}} = -0,22074$  Hartrees

|   |             |             |             |
|---|-------------|-------------|-------------|
| C | 5.21682800  | 0.67517700  | -0.03636300 |
| C | 4.42006100  | 1.82496400  | -0.03438900 |
| C | 3.05705300  | 1.53353000  | -0.01839500 |
| C | 2.79337000  | 0.17298800  | -0.00068500 |
| S | 4.21606000  | -0.79314200 | -0.00804400 |
| H | 4.84699900  | 2.81856700  | -0.04753100 |
| C | 1.37270700  | -0.07937900 | 0.02018700  |
| C | 0.64698600  | -1.27587300 | 0.01662400  |
| C | 0.73181600  | 1.18569800  | 0.02825700  |
| C | -0.73195000 | -1.18574300 | 0.02863400  |
| H | 1.14909900  | -2.23507200 | 0.00174200  |
| C | -0.64711400 | 1.27581900  | 0.01551800  |
| C | -1.37283600 | 0.07932700  | 0.01946600  |
| H | -1.14922100 | 2.23500600  | -0.00020500 |
| C | -2.79348800 | -0.17305300 | -0.00197000 |
| C | -3.05716200 | -1.53360600 | -0.01900300 |
| S | -4.21617300 | 0.79307300  | -0.01067500 |
| C | -4.42016200 | -1.82504700 | -0.03559500 |
| C | -5.21692600 | -0.67526100 | -0.03868400 |
| H | -4.84708900 | -2.81865900 | -0.04843100 |
| C | 1.75943500  | 2.33420300  | 0.01401900  |
| C | -1.75956000 | -2.33425800 | 0.01461000  |

|   |              |             |             |
|---|--------------|-------------|-------------|
| C | -6.63213200  | -0.71440300 | -0.06400800 |
| H | -7.04163600  | -1.71987500 | -0.07810100 |
| C | 6.63204800   | 0.71430700  | -0.06089600 |
| H | 7.04155700   | 1.71977300  | -0.07532300 |
| C | 7.56025800   | -0.30002200 | -0.06977300 |
| C | -7.56033400  | 0.29992300  | -0.07399700 |
| C | -7.23039600  | 1.68316200  | -0.05822700 |
| N | -6.96477900  | 2.80904500  | -0.04527900 |
| C | -8.95019000  | -0.01100800 | -0.10242000 |
| N | -10.07964200 | -0.25876800 | -0.12578800 |
| C | 7.23031600   | -1.68325300 | -0.05341500 |
| N | 6.96469400   | -2.80912900 | -0.03998600 |
| C | 8.95013000   | 0.01089500  | -0.09757500 |
| N | 10.07959400  | 0.25864400  | -0.12043500 |
| C | -1.52587600  | -3.17337100 | -1.25393000 |
| C | -0.59265200  | -4.21672500 | -1.24215500 |
| C | -2.16442700  | -2.85745200 | -2.45635500 |
| C | -0.30884900  | -4.92944200 | -2.40442700 |
| H | -0.09395800  | -4.48291800 | -0.31796100 |
| C | -1.88286000  | -3.57262900 | -3.61955700 |
| H | -2.88437400  | -2.04893000 | -2.49015400 |
| C | -0.95466300  | -4.61119400 | -3.59852300 |
| H | 0.41499400   | -5.73591000 | -2.37471800 |
| H | -2.39198300  | -3.31579000 | -4.54157100 |
| H | -0.73755700  | -5.16879900 | -4.50226700 |
| C | -1.75702500  | -3.17990000 | 1.30168200  |
| C | -2.49288300  | -4.37168800 | 1.33611500  |
| C | -1.11417800  | -2.75614600 | 2.46680600  |
| C | -2.57593800  | -5.12379800 | 2.50373500  |
| H | -2.99322700  | -4.71972300 | 0.44001700  |
| C | -1.19579900  | -3.51077700 | 3.63778500  |
| H | -0.54561500  | -1.83506500 | 2.46920200  |
| C | -1.92465200  | -4.69648000 | 3.66126100  |
| H | -3.14694100  | -6.04530300 | 2.50855400  |
| H | -0.68530200  | -3.16763700 | 4.53050200  |
| H | -1.98491400  | -5.28371800 | 4.57026200  |
| C | 1.52640900   | 3.17247200  | -1.25520400 |
| C | 0.59314500   | 4.21580200  | -1.24461700 |
| C | 2.16562400   | 2.85579200  | -2.45707600 |
| C | 0.30994800   | 4.92775200  | -2.40750600 |

|   |             |            |             |
|---|-------------|------------|-------------|
| H | 0.09394400  | 4.48258700 | -0.32086700 |
| C | 1.88466300  | 3.57020000 | -3.62089600 |
| H | 2.88562200  | 2.04727700 | -2.48995600 |
| C | 0.95641900  | 4.60874600 | -3.60104500 |
| H | -0.41393700 | 5.73421600 | -2.37871500 |
| H | 2.39429500  | 3.31277700 | -4.54246600 |
| H | 0.73978500  | 5.16575400 | -4.50527000 |
| C | 1.75624300  | 3.18070000 | 1.30052400  |
| C | 1.11289100  | 2.75766200 | 2.46562900  |
| C | 2.49201100  | 4.37255500 | 1.33451500  |
| C | 1.19392800  | 3.51306200 | 3.63615300  |
| H | 0.54438900  | 1.83654400 | 2.46836200  |
| C | 2.57448500  | 5.12543000 | 2.50168300  |
| H | 2.99274100  | 4.72003900 | 0.43841800  |
| C | 1.92269500  | 4.69882600 | 3.65918900  |
| H | 0.68304600  | 3.17047100 | 4.52886100  |
| H | 3.14542800  | 6.04697400 | 2.50616300  |
| H | 1.98250500  | 5.28666000 | 4.56783500  |

**Table S2. DFT coordinates of IDT-2**

E= -4653.16839656 Hartrees

E<sub>LUMO</sub>= -0,11821 Hartrees

E<sub>HOMO</sub>= -0,20582 Hartrees

|   |             |             |             |
|---|-------------|-------------|-------------|
| C | 5.24584000  | 0.52532100  | -0.28166200 |
| C | 4.48585800  | 1.69371000  | -0.28387900 |
| C | 3.10994000  | 1.44141300  | -0.27011600 |
| C | 2.79936600  | 0.09415600  | -0.25002600 |
| S | 4.20033600  | -0.90968700 | -0.25311200 |
| H | 4.94218000  | 2.67415700  | -0.29708500 |
| C | 1.37114200  | -0.11376200 | -0.23070400 |
| C | 0.60398300  | -1.28422800 | -0.22846200 |
| C | 0.77110500  | 1.17066600  | -0.22837500 |
| C | -0.77159000 | -1.14798900 | -0.21646100 |
| H | 1.07358600  | -2.26009900 | -0.23743400 |
| C | -0.60445600 | 1.30677500  | -0.24208400 |
| C | -1.37160900 | 0.13634800  | -0.23229500 |
| H | -1.07406100 | 2.28249700  | -0.26132500 |
| C | -2.79982300 | -0.07172100 | -0.24981900 |
| C | -3.11044800 | -1.41910500 | -0.25583500 |
| S | -4.20071500 | 0.93213500  | -0.26398900 |
| C | -4.48639700 | -1.67141000 | -0.26729500 |

|   |              |             |             |
|---|--------------|-------------|-------------|
| C | -5.24629800  | -0.50301400 | -0.27789200 |
| H | -4.94285500  | -2.65188100 | -0.27036400 |
| C | 1.83799000   | 2.28368400  | -0.24340800 |
| C | -1.83851200  | -2.26109900 | -0.22037500 |
| C | -6.66759300  | -0.46588300 | -0.29856500 |
| H | -7.14722800  | -1.44179600 | -0.30215500 |
| C | 6.66715200   | 0.48802200  | -0.30074800 |
| H | 7.14675200   | 1.46383300  | -0.31639200 |
| C | -7.53715200  | 0.57715200  | -0.31521000 |
| C | 7.53674300   | -0.55511900 | -0.30294300 |
| S | -7.20527000  | 2.31152200  | -0.31505900 |
| S | 7.20484700   | -2.28930600 | -0.27959300 |
| C | -8.93136100  | 2.70825200  | -0.34850900 |
| C | -8.98924100  | 0.34159900  | -0.33655100 |
| C | 8.93095500   | -2.68645100 | -0.30544000 |
| C | 8.98886100   | -0.31985900 | -0.32605400 |
| S | -9.46964700  | 4.27663100  | -0.35404400 |
| S | 9.46918800   | -4.25476800 | -0.28901600 |
| O | -9.55588800  | -0.73379700 | -0.32892800 |
| O | 9.55544900   | 0.75557000  | -0.33282900 |
| N | -9.68244900  | 1.57102100  | -0.36892900 |
| N | 9.68210900   | -1.54961500 | -0.34051100 |
| C | -11.15556300 | 1.57339100  | -0.36205000 |
| H | -11.46047800 | 0.65978700  | -0.87059200 |
| H | -11.48207800 | 2.43076400  | -0.94852200 |
| C | 11.15522100  | -1.55200900 | -0.33176100 |
| H | 11.48240700  | -2.41678400 | -0.90689200 |
| H | 11.46084200  | -0.64497800 | -0.85151300 |
| C | -11.71163400 | 1.62157400  | 1.05870300  |
| H | -11.38177200 | 0.75095200  | 1.62910400  |
| H | -11.38445500 | 2.52701400  | 1.57288100  |
| H | -12.80342800 | 1.61834000  | 1.02526500  |
| C | 11.70961000  | -1.58217600 | 1.09015000  |
| H | 12.80144300  | -1.57924200 | 1.05792400  |
| H | 11.37902200  | -0.70446600 | 1.64916000  |
| H | 11.38194500  | -2.48109100 | 1.61534100  |
| C | 1.63689700   | 3.12631100  | -1.51478200 |
| C | 0.73644500   | 4.19831800  | -1.51157100 |
| C | 2.27263800   | 2.78852400  | -2.71280700 |
| C | 0.48120600   | 4.91643600  | -2.67714200 |

|   |             |             |             |
|---|-------------|-------------|-------------|
| H | 0.24099900  | 4.48197400  | -0.59080400 |
| C | 2.01979300  | 3.50882600  | -3.87951200 |
| H | 2.96828900  | 1.95875300  | -2.73899300 |
| C | 1.12357000  | 4.57528700  | -3.86684600 |
| H | -0.21758300 | 5.74500800  | -2.65365600 |
| H | 2.52635500  | 3.23418000  | -4.79787200 |
| H | 0.92888500  | 5.13685900  | -4.77329500 |
| C | 1.85989500  | 3.13403900  | 1.03995000  |
| C | 2.63622500  | 4.30004200  | 1.07292300  |
| C | 1.19880000  | 2.73789700  | 2.20471800  |
| C | 2.74115700  | 5.05378700  | 2.23774000  |
| H | 3.15236500  | 4.62576500  | 0.17737000  |
| C | 1.30254300  | 3.49383500  | 3.37314000  |
| H | 0.59849400  | 1.83720700  | 2.20756600  |
| C | 2.07163100  | 4.65396600  | 3.39474600  |
| H | 3.34403900  | 5.95483900  | 2.24107000  |
| H | 0.77767000  | 3.17187300  | 4.26549900  |
| H | 2.14916500  | 5.24237400  | 4.30174400  |
| C | -1.86051500 | -3.09868000 | 1.07134100  |
| C | -2.63647100 | -4.26455700 | 1.11573000  |
| C | -1.19973300 | -2.69081700 | 2.23224100  |
| C | -2.74144700 | -5.00669100 | 2.28798100  |
| H | -3.15227500 | -4.59943400 | 0.22336400  |
| C | -1.30350900 | -3.43512200 | 3.40810200  |
| H | -0.59960700 | -1.79001400 | 2.22622300  |
| C | -2.07229800 | -4.59518800 | 3.44109500  |
| H | -3.34404700 | -5.90785600 | 2.30013100  |
| H | -0.77887300 | -3.10418700 | 4.29731200  |
| H | -2.14985400 | -5.17457700 | 4.35387900  |
| C | -1.63719800 | -3.11641200 | -1.48323500 |
| C | -0.73589600 | -4.18762900 | -1.46937500 |
| C | -2.27354800 | -2.79135900 | -2.68444800 |
| C | -0.48039300 | -4.91735400 | -2.62764200 |
| H | -0.23991400 | -4.46145700 | -0.54592000 |
| C | -2.02045700 | -3.52330700 | -3.84383400 |
| H | -2.96983100 | -1.96242700 | -2.71891700 |
| C | -1.12337400 | -4.58885700 | -3.82058000 |
| H | 0.21908400  | -5.74507100 | -2.59593400 |
| H | -2.52749700 | -3.25842000 | -4.76479400 |
| H | -0.92848200 | -5.15946800 | -4.72132200 |

**Table S3. DFT coordinates of IDT-3**

E= -4653.11665209 Hartrees

E<sub>LUMO</sub>= -0,11170 HartreesE<sub>HOMO</sub>= -0,20271 Hartrees

|   |             |             |             |
|---|-------------|-------------|-------------|
| C | 5.27341100  | 0.42431800  | -0.26821200 |
| C | 4.54308400  | 1.60949100  | -0.27111800 |
| C | 3.15937900  | 1.39103400  | -0.26241400 |
| C | 2.81551100  | 0.05332400  | -0.24481400 |
| S | 4.19302900  | -0.98436200 | -0.24488900 |
| H | 5.02330700  | 2.57858300  | -0.28086400 |
| C | 1.38193200  | -0.11965100 | -0.22873200 |
| C | 0.58553800  | -1.27037200 | -0.22723800 |
| C | 0.81354800  | 1.17871500  | -0.22685700 |
| C | -0.78656700 | -1.10016100 | -0.21576900 |
| H | 1.03099600  | -2.25766400 | -0.23518100 |
| C | -0.55854100 | 1.34879000  | -0.24149200 |
| C | -1.35494200 | 0.19810500  | -0.23173400 |
| H | -1.00398300 | 2.33594600  | -0.26029500 |
| C | -2.78850300 | 0.02495700  | -0.24730300 |
| C | -3.13238000 | -1.31286800 | -0.25118400 |
| S | -4.16597900 | 1.06263100  | -0.25929000 |
| C | -4.51610400 | -1.53134100 | -0.25865500 |
| C | -5.24638500 | -0.34618200 | -0.26885500 |
| H | -4.99641800 | -2.50043800 | -0.25864900 |
| C | 1.90841800  | 2.26466000  | -0.23941400 |
| C | -1.88142600 | -2.18621100 | -0.21814900 |
| C | -6.66952500 | -0.27020100 | -0.28552700 |
| H | -7.17521800 | -1.23343100 | -0.28515500 |
| C | 6.69656400  | 0.34816000  | -0.28271300 |
| H | 7.20227400  | 1.31132600  | -0.29304200 |
| C | -7.51550800 | 0.78779200  | -0.30221900 |
| C | 7.54253600  | -0.70996600 | -0.28623900 |
| S | -7.13435800 | 2.51078800  | -0.31136100 |
| S | 7.16137000  | -2.43293800 | -0.27494600 |
| C | -8.90259300 | 2.83037800  | -0.33347600 |
| C | -9.00016200 | 0.59501800  | -0.31757800 |
| C | 8.92961100  | -2.75278100 | -0.29218400 |
| C | 9.02720700  | -0.51739500 | -0.30265100 |
| S | -9.39411600 | 4.49872000  | -0.35129600 |
| S | 9.42113700  | -4.42120800 | -0.29027400 |

|   |             |             |             |
|---|-------------|-------------|-------------|
| O | -9.54894100 | -0.49025400 | -0.31580000 |
| O | 9.57600100  | 0.56781900  | -0.31315500 |
| N | -9.69626200 | 1.81777500  | -0.33466200 |
| N | 9.72330400  | -1.74027300 | -0.30481500 |
| C | 1.73183400  | 3.11151100  | -1.51154800 |
| C | 0.85587100  | 4.20370700  | -1.51245200 |
| C | 2.36556500  | 2.76005500  | -2.70670000 |
| C | 0.62213500  | 4.92752200  | -2.67899000 |
| H | 0.36275200  | 4.49825700  | -0.59382900 |
| C | 2.13431100  | 3.48593900  | -3.87445600 |
| H | 3.04289000  | 1.91517800  | -2.72928000 |
| C | 1.26204200  | 4.57212000  | -3.86588300 |
| H | -0.05785600 | 5.77172000  | -2.65855600 |
| H | 2.63908900  | 3.20024400  | -4.79044700 |
| H | 1.08426200  | 5.13801700  | -4.77314100 |
| C | 1.94796100  | 3.11543900  | 1.04301600  |
| C | 2.75419100  | 4.26098100  | 1.07748600  |
| C | 1.27324800  | 2.73798600  | 2.20623400  |
| C | 2.87539300  | 5.01285400  | 2.24193800  |
| H | 3.28171300  | 4.57174500  | 0.18325000  |
| C | 1.39325000  | 3.49202000  | 3.37435100  |
| H | 0.64964700  | 1.85326400  | 2.20772500  |
| C | 2.19236200  | 4.63169000  | 3.39737500  |
| H | 3.50194000  | 5.89763700  | 2.24640200  |
| H | 0.85768300  | 3.18452500  | 4.26549600  |
| H | 2.28285200  | 5.21853300  | 4.30421400  |
| C | -1.92196200 | -3.02389900 | 1.07283600  |
| C | -2.72713100 | -4.16980900 | 1.11805300  |
| C | -1.24916200 | -2.63380300 | 2.23300300  |
| C | -2.84926700 | -4.90965500 | 2.29010200  |
| H | -3.25305800 | -4.49045100 | 0.22636700  |
| C | -1.37008400 | -3.37578400 | 3.40870700  |
| H | -0.62632400 | -1.74856000 | 2.22613600  |
| C | -2.16820800 | -4.51589000 | 3.44245800  |
| H | -3.47498100 | -5.79494700 | 2.30286600  |
| H | -0.83600300 | -3.05859700 | 4.29734300  |
| H | -2.25941300 | -5.09338300 | 4.35521000  |
| C | -1.70363000 | -3.04594800 | -1.48144100 |
| C | -0.82662600 | -4.13726700 | -1.47072100 |
| C | -2.33724100 | -2.70751900 | -2.68040100 |



|   |              |             |             |
|---|--------------|-------------|-------------|
| C | -0.59171400  | -4.87287300 | -2.62960500 |
| H | -0.33357200  | -4.42179900 | -0.54890800 |
| C | -2.10480800  | -3.44521600 | -3.84050200 |
| H | -3.01536900  | -1.86358100 | -2.71201000 |
| C | -1.23148500  | -4.53038400 | -3.82037200 |
| H | 0.08909300   | -5.71614700 | -2.60017400 |
| H | -2.60950300  | -3.16949100 | -4.75959000 |
| H | -1.05277600  | -5.10545400 | -4.72166000 |
| C | -11.23284800 | 4.31862800  | -0.37481000 |
| H | -11.48805700 | 3.73527400  | -1.25843600 |
| H | -11.51217400 | 3.74964400  | 0.51086400  |
| C | -11.87313400 | 5.70245600  | -0.39489000 |
| H | -11.58378600 | 6.26873800  | -1.28305800 |
| H | -12.95959100 | 5.58798300  | -0.40819600 |
| H | -11.60713000 | 6.28380800  | 0.49083300  |
| C | 11.25991100  | -4.24133400 | -0.31148300 |
| H | 11.53713100  | -3.66267200 | 0.56857900  |
| H | 11.51720400  | -3.66767800 | -1.20082300 |
| C | 11.90021400  | -5.62529500 | -0.31483400 |
| H | 11.61285400  | -6.20135600 | -1.19734200 |
| H | 12.98670300  | -5.51098400 | -0.32694500 |
| H | 11.63218100  | -6.19681300 | 0.57666300  |

**Table S4. DFT coordinates of IDT-4**

E= -4653.11665209 Hartrees

E<sub>LUMO</sub>= -0,13405 Hartrees

E<sub>HOMO</sub>= -0,21535 Hartrees

|   |             |             |             |
|---|-------------|-------------|-------------|
| C | 5.24342700  | 0.46316000  | -0.01326200 |
| C | 4.48136000  | 1.64589400  | -0.01099900 |
| C | 3.11252900  | 1.41346800  | -0.00282000 |
| C | 2.79932800  | 0.06043300  | 0.00963400  |
| S | 4.17923000  | -0.96578400 | 0.00519700  |
| H | 4.94799000  | 2.62190800  | -0.01738300 |
| C | 1.36977000  | -0.13181300 | 0.02643200  |
| C | 0.59743300  | -1.29976900 | 0.02209200  |
| C | 0.77668200  | 1.15726700  | 0.03541400  |
| C | -0.77670100 | -1.15727300 | 0.03484300  |
| H | 1.06376200  | -2.27701700 | 0.00799900  |
| C | -0.59744200 | 1.29976100  | 0.02154300  |
| C | -1.36978200 | 0.13180500  | 0.02530700  |
| H | -1.06375900 | 2.27700800  | 0.00701800  |

|   |              |             |             |
|---|--------------|-------------|-------------|
| C | -2.79932600  | -0.06044200 | 0.00734700  |
| C | -3.11251600  | -1.41347900 | -0.00528600 |
| S | -4.17922100  | 0.96577700  | 0.00172700  |
| C | -4.48134200  | -1.64590300 | -0.01457700 |
| C | -5.24340400  | -0.46316800 | -0.01750800 |
| H | -4.94797100  | -2.62191500 | -0.02128500 |
| C | 1.84802900   | 2.26517400  | 0.02722200  |
| C | -1.84803900  | -2.26518100 | 0.02587100  |
| C | -6.65765700  | -0.52844600 | -0.03626400 |
| H | -6.97588100  | -1.56240400 | -0.04536600 |
| C | 6.65769400   | 0.52843700  | -0.03096600 |
| H | 6.97592600   | 1.56239300  | -0.03986200 |
| C | -7.66586300  | 0.40869800  | -0.04342600 |
| C | -9.79581700  | 1.45652200  | -0.04844200 |
| C | -8.83020500  | 2.47627200  | -0.02589700 |
| C | -11.14862000 | 1.80635500  | -0.05226100 |
| C | -9.16240200  | 3.82102900  | -0.00823600 |
| C | -11.48961100 | 3.16043600  | -0.03409100 |
| H | -11.93454700 | 1.06814800  | -0.06813200 |
| C | -10.51437900 | 4.16206900  | -0.01259900 |
| H | -8.38252600  | 4.57267800  | 0.00860000  |
| H | -12.53720800 | 3.43684100  | -0.03664900 |
| H | -10.81322800 | 5.20327500  | 0.00092100  |
| C | 7.66590300   | -0.40870900 | -0.03736600 |
| C | 9.79586100   | -1.45653000 | -0.04063400 |
| C | 8.83023400   | -2.47627900 | -0.01867200 |
| C | 11.14866800  | -1.80636100 | -0.04336700 |
| C | 9.16242100   | -3.82103200 | -0.00056100 |
| C | 11.48964700  | -3.16043800 | -0.02473600 |
| H | 11.93460400  | -1.06815400 | -0.05874200 |
| C | 10.51440100  | -4.16207000 | -0.00384400 |
| H | 8.38253400   | -4.57268100 | 0.01579000  |
| H | 12.53724700  | -3.43684000 | -0.02645100 |
| H | 10.81324200  | -5.20327400 | 0.01005500  |
| C | -9.10480000  | 0.14211800  | -0.06480600 |
| C | -7.48070800  | 1.87627600  | -0.02351500 |
| O | -6.42505300  | 2.49020300  | -0.00660300 |
| C | 9.10485400   | -0.14213100 | -0.05776300 |
| C | 7.48073400   | -1.87628500 | -0.01740800 |
| O | 6.42506800   | -2.49021200 | -0.00121300 |

|   |              |             |             |
|---|--------------|-------------|-------------|
| C | 9.74790300   | 1.08117500  | -0.09208900 |
| C | -9.74783000  | -1.08119400 | -0.09927300 |
| C | -9.08754400  | -2.34303200 | -0.12408500 |
| N | -8.60267000  | -3.39362700 | -0.14628400 |
| C | -11.16404700 | -1.23004900 | -0.11761300 |
| N | -12.30628100 | -1.41304900 | -0.13370200 |
| C | 9.08762900   | 2.34300000  | -0.11779000 |
| N | 8.60276300   | 3.39358400  | -0.14069200 |
| C | 11.16413400  | 1.23003200  | -0.10940700 |
| N | 12.30637800  | 1.41303300  | -0.12468200 |
| C | -1.65128800  | -3.11690600 | -1.24037300 |
| C | -0.75500700  | -4.19225000 | -1.22927300 |
| C | -2.28641300  | -2.78529000 | -2.44030400 |
| C | -0.50335300  | -4.92001300 | -2.38956500 |
| H | -0.26054200  | -4.47128400 | -0.30656900 |
| C | -2.03739400  | -3.51557500 | -3.60157500 |
| H | -2.97895700  | -1.95319800 | -2.47304900 |
| C | -1.14533200  | -4.58533300 | -3.58128300 |
| H | 0.19198300   | -5.75125100 | -2.36021200 |
| H | -2.54389500  | -3.24621700 | -4.52148000 |
| H | -0.95378600  | -5.15470200 | -4.48350200 |
| C | -1.87507000  | -3.10840800 | 1.31396700  |
| C | -2.66411400  | -4.26559600 | 1.35335100  |
| C | -1.20721000  | -2.71378900 | 2.47515000  |
| C | -2.77523200  | -5.01236400 | 2.52194400  |
| H | -3.18578700  | -4.58970600 | 0.46042700  |
| C | -1.31658300  | -3.46343500 | 3.64721200  |
| H | -0.59765400  | -1.81929900 | 2.47365700  |
| C | -2.09871100  | -4.61455100 | 3.67565100  |
| H | -3.38867800  | -5.90614700 | 2.53082200  |
| H | -0.78634800  | -3.14318700 | 4.53697700  |
| H | -2.18127200  | -5.19763500 | 4.58561600  |
| C | 1.87401300   | 3.10853500  | 1.31524900  |
| C | 2.66301400   | 4.26573600  | 1.35514600  |
| C | 1.20522500   | 2.71402700  | 2.47593600  |
| C | 2.77318600   | 5.01262600  | 2.52375100  |
| H | 3.18540500   | 4.58975700  | 0.46261000  |
| C | 1.31365100   | 3.46379500  | 3.64800700  |
| H | 0.59568400   | 1.81952700  | 2.47404200  |
| C | 2.09574300   | 4.61492300  | 3.67695500  |

|   |             |            |             |
|---|-------------|------------|-------------|
| H | 3.38661400  | 5.90641600 | 2.53302900  |
| H | 0.78270700  | 3.14363300 | 4.53738100  |
| H | 2.17756700  | 5.19810200 | 4.58692600  |
| C | 1.65231600  | 3.11677400 | -1.23926900 |
| C | 0.75594600  | 4.19205400 | -1.22902700 |
| C | 2.28849700  | 2.78511000 | -2.43862700 |
| C | 0.50523400  | 4.91970500 | -2.38959200 |
| H | 0.26066200  | 4.47112300 | -0.30677300 |
| C | 2.04042100  | 3.51528300 | -3.60017000 |
| H | 2.98113100  | 1.95306800 | -2.47071100 |
| C | 1.14826400  | 4.58497700 | -3.58073200 |
| H | -0.19018900 | 5.75089300 | -2.36090400 |
| H | 2.54773200  | 3.24588900 | -4.51961800 |
| H | 0.95745000  | 5.15425900 | -4.48316100 |

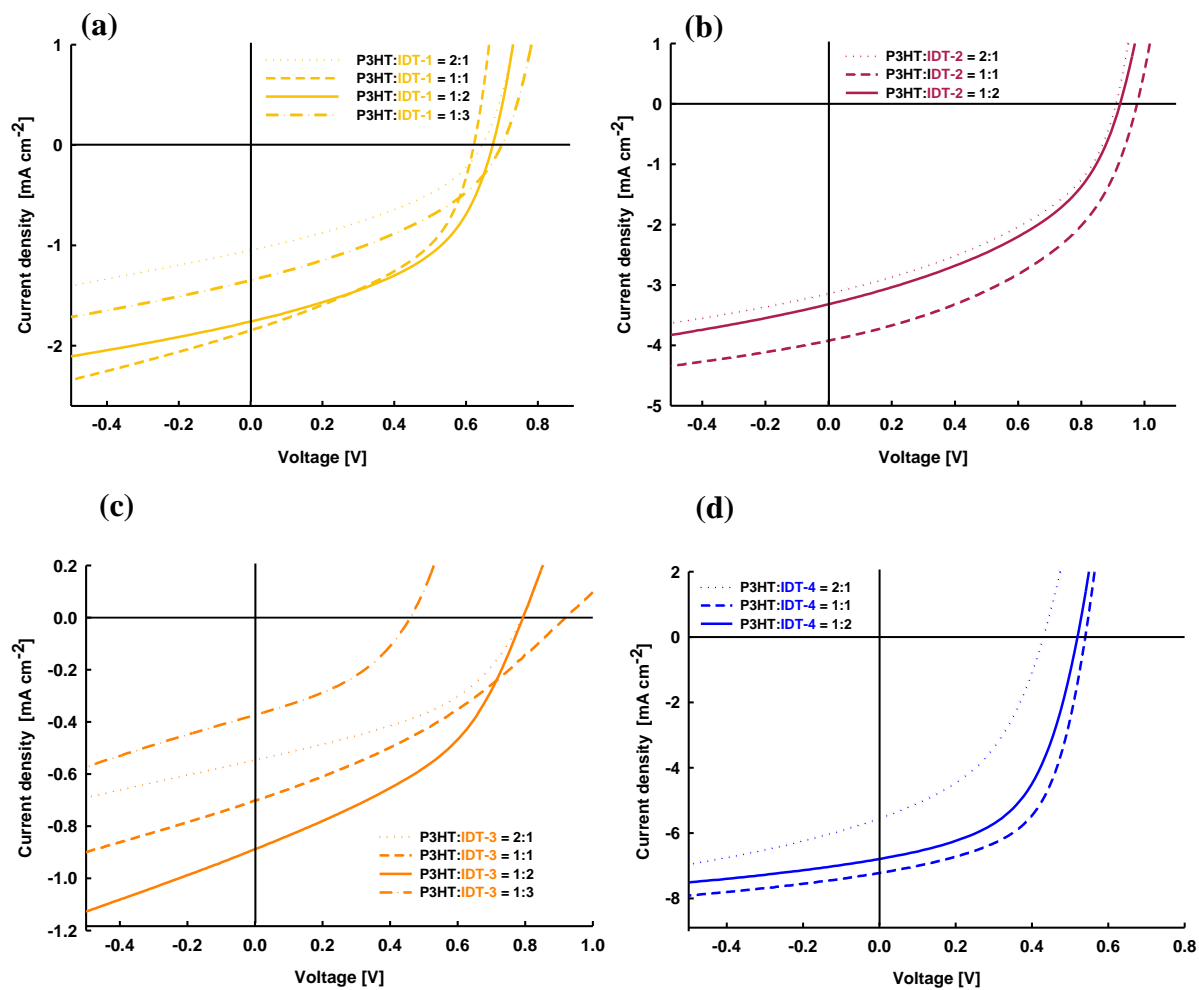

Figure S17.  $J$ - $V$  characteristics of BHJ OSCs for different P3HT :  $n$ -type molecule ratios. (a) IDT-1, (b) IDT-2, (c) IDT-3 and (d) IDT-4

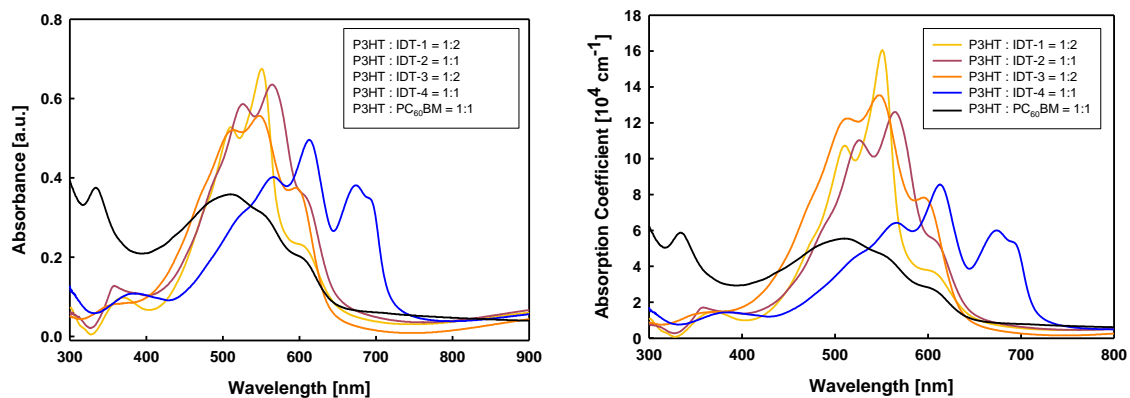

Figure S18. Absorption spectra of P3HT :  $n$ -type molecule blend films of  $\text{ca } 70\text{-}80\text{ nm}$  thickness

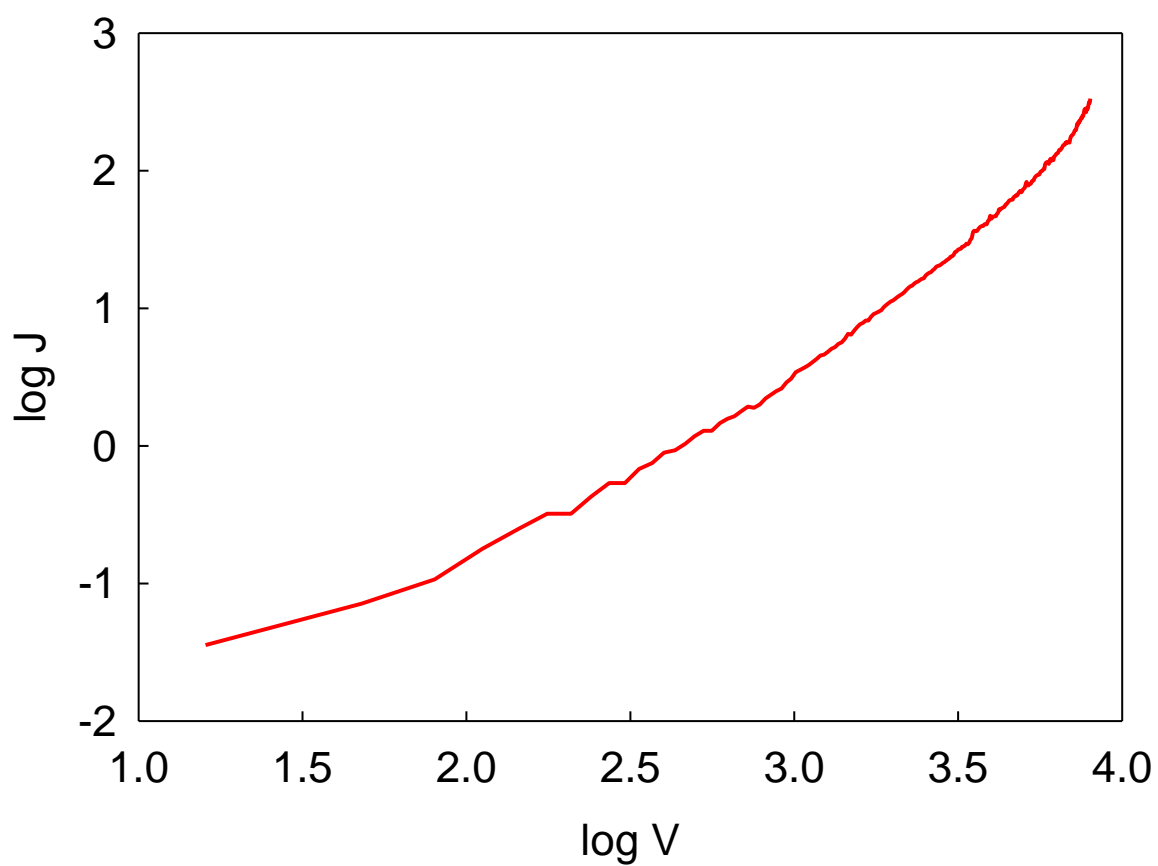

Figure S19. Log J-log V curve of the electron-only devices with the structure of ITO/ZnO (20nm)/IDT-2(50nm)/Bphen (15 nm)/Ag (100 nm)

Data extracted from Figure S19 that are used to calculate the electron mobility

| Log(V[mV]) | Log(J [mA/cm <sup>2</sup> ]) | V [V]  | J [A/cm <sup>2</sup> ] | L [cm]   | $\mu_e$ [cm <sup>2</sup> /Vs] |
|------------|------------------------------|--------|------------------------|----------|-------------------------------|
| 2.89       | 0.2616                       | 0.7762 | 0.001826417            | 0.000005 | 1.26927E-06                   |

Table S5. Photovoltaic characteristics of IDT-1, IDT-2, IDT-3, IDT-4 and PC<sub>60</sub>BM under various conditions

|                          | D:A   | rpm/s               | Thickness<br>[nm] | V <sub>oc</sub><br>[V] | J <sub>sc</sub><br>[mAcm <sup>-2</sup> ] | FF<br>[%]          | PCE <sup>a</sup><br>[%]  |
|--------------------------|-------|---------------------|-------------------|------------------------|------------------------------------------|--------------------|--------------------------|
| <b>IDT-1</b>             | 1:1   |                     | 70                | 0.62                   | 1.85                                     | 45.00              | 0.52 (0.37)              |
|                          | 1:2   | 1000/40 +           | 70                | 0.67                   | 1.76                                     | 46.32              | 0.55 (0.52)              |
|                          | 1:3   | 8000/20             | 70                | 0.70                   | 1.35                                     | 38.34              | 0.36 (0.31)              |
|                          | 2:1   |                     | 70                | 0.64                   | 1.05                                     | 38.36              | 0.26 (0.19)              |
| <b>IDT-2</b>             | 1:1   |                     | 80                | 0.97                   | 3.91                                     | 45.56              | 1.74 (1.67)              |
|                          | 1:2   | 1000/40 +           | 80                | 0.92                   | 3.32                                     | 43.54              | 1.33 (1.28)              |
|                          | 2:1   | 8000/20             | 80                | 0.91                   | 3.14                                     | 43.12              | 1.23 (1.14)              |
| <b>IDT-3</b>             | 1:1   |                     | 60                | 0.82                   | 0.82                                     | 38.47              | 0.26 (0.22)              |
|                          | 1:2   | 1000/40 +           | 60                | 0.79                   | 0.89                                     | 41.31              | 0.29 (0.26)              |
|                          | 1:3   | 8000/20             | 60                | 0.46                   | 0.37                                     | 38.84              | 0.07 (0.06)              |
|                          | 2:1   |                     | 60                | 0.79                   | 0.55                                     | 43.28              | 0.19 (0.16)              |
| <b>IDT-4</b>             | 1:1   |                     | 80                | 0.54                   | 7.23                                     | 56.53              | 2.21 (2.16)              |
|                          | 1:2   | 1000/40 +           | 80                | 0.52                   | 6.78                                     | 52.51              | 1.85 (1.66)              |
|                          | 2:1   | 8000/20             | 80                | 0.43                   | 5.55                                     | 43.11              | 1.03 (0.92)              |
| <b>PC<sub>60</sub>BM</b> | 1:1   | 1500/40+<br>3000/20 | 80                | 0.53                   | 3.32                                     | 17.45              | 0.34 (0.26)              |
|                          | 1:1   | 1500/40+<br>3000/20 | 80                | 0.51 <sup>b</sup>      | 6.44 <sup>b</sup>                        | 52.98 <sup>b</sup> | 1.72 (1.51) <sup>b</sup> |
|                          | 1:1   | 1500/60+<br>4000/20 | 150               | 0.54                   | 6.29                                     | 52.53              | 1.77 (1.69)              |
|                          | 1:1   | 1000/60<br>+3000/20 | 200               | 0.59                   | 8.26                                     | 56.32              | 2.76 (2.43)              |
|                          | 1:0.8 | 1000/60<br>+3000/20 | 170               | 0.58                   | 8.00                                     | 53.95              | 2.50 (2.43)              |
|                          | 1:0.6 | 500/60<br>+3000/20  | 250               | 0.52                   | 6.36                                     | 51.40              | 1.70 (1.60)              |
|                          |       |                     |                   |                        |                                          |                    |                          |

<sup>a</sup> Average power conversion efficiencies are given in parenthesis.

<sup>b</sup> After 10 min thermal treatment at 130 °C.

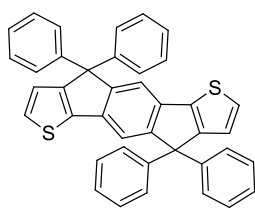

IDT

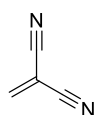

EWG=

(1)

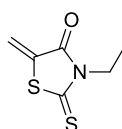

(2)

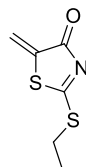

(3)

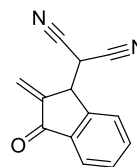

(4)

|                | $E_{\text{HOMO}}$ (eV) | $E_{\text{LUMO}}$ (eV) |
|----------------|------------------------|------------------------|
| <b>IDT</b>     | -5.45                  | -1.71                  |
| <b>EWG=(1)</b> | -8.50                  | -2.74                  |
| <b>EWG=(2)</b> | -6.75                  | -2.69                  |
| <b>EWG=(3)</b> | -6.89                  | -2.45                  |
| <b>EWG=(4)</b> | -7.36                  | -3.46                  |

Chart S1. HOMO-LUMO energy levels for the IDT core and electron-withdrawing groups
